# Supplementary material
Source: HighWire-hosted journal article supplement (https://bjsm.bmj.com/content/52/8/505)
Supplement: inline-supplementary-material-2 [file inline-supplementary-material-2.docx]

*Supplementary online Table 2. Exercise intensity based on American College of Sports Medicine (ACSM) guidelines*

| **Aerobic exercise** | | | |
| --- | --- | --- | --- |
|  | HRmax (%) | HRR (%); VO2max(%); VO2r(%) | RPE |
| Low | <64 | <40 | <11 |
| Moderate | 64 - <77 | 40 - <60 | 12 - 13 |
| High | 77 - 100 | 60 - 100 | >14 |
| **Resistance exercise** | | | |
| Low | Less than 8 repetitions at an intensity at or below 40% to 80% of a 1-RM | | |
| Moderate | 8 to 12 repetitions at an intensity of 40% to 80% of a 1-RM | | |
| High | More than 12 repetitions at an intensity at or above 40% to 80% of a 1-RM | | |

*HRmax = maximal heart rate, HRR = heart rate reserve, VO2max = maximal oxygen uptake, VO2r = oxygen uptake reserve,*

*RPE = rating of perceived exertion, 1-RM = one repetition maximum*
